# Supplementary material for: Investigation of target sequencing of SARS-CoV-2 and immunogenic GWAS profiling in host cells of COVID-19 in Vietnam
Source: Springer Nature journal article supplement (doi:10.1186/s12879-022-07415-1), 2022-06-19
Supplement: MOESM1 [file 23181294]

# BMC infectious diseases supplementary

Tham Hoang

November 2021

## List of Supplementary Figures

|   |                                                                                                                                                                                                                                                                             |   |
|---|-----------------------------------------------------------------------------------------------------------------------------------------------------------------------------------------------------------------------------------------------------------------------------|---|
| 1 | Percentage of Clades by month in Vietnam and Thailand. . . . .                                                                                                                                                                                                              | 2 |
| 2 | Percentage by Lineage by month in Vietnam and Thailand. . . . .                                                                                                                                                                                                             | 2 |
| 3 | Scatter plots of allele frequency from datasets: one from WGS of Vietnamese people in the 1000 Genomes Project with high coverage, and the other from WGS of 1000 Vietnamese people [1] with nine immune gene sets associated with severity of COVID-19 in Vietnam. . . . . | 3 |
| 4 | Scatter plots of allele frequency from datasets: one from WGS of Vietnamese people in the 1000 Genomes Project with high coverage, and the other from WGS of 1000 Vietnamese people [1] with 6 target gene sets of COVID-19 drugs used in Vietnam. . . . .                  | 4 |



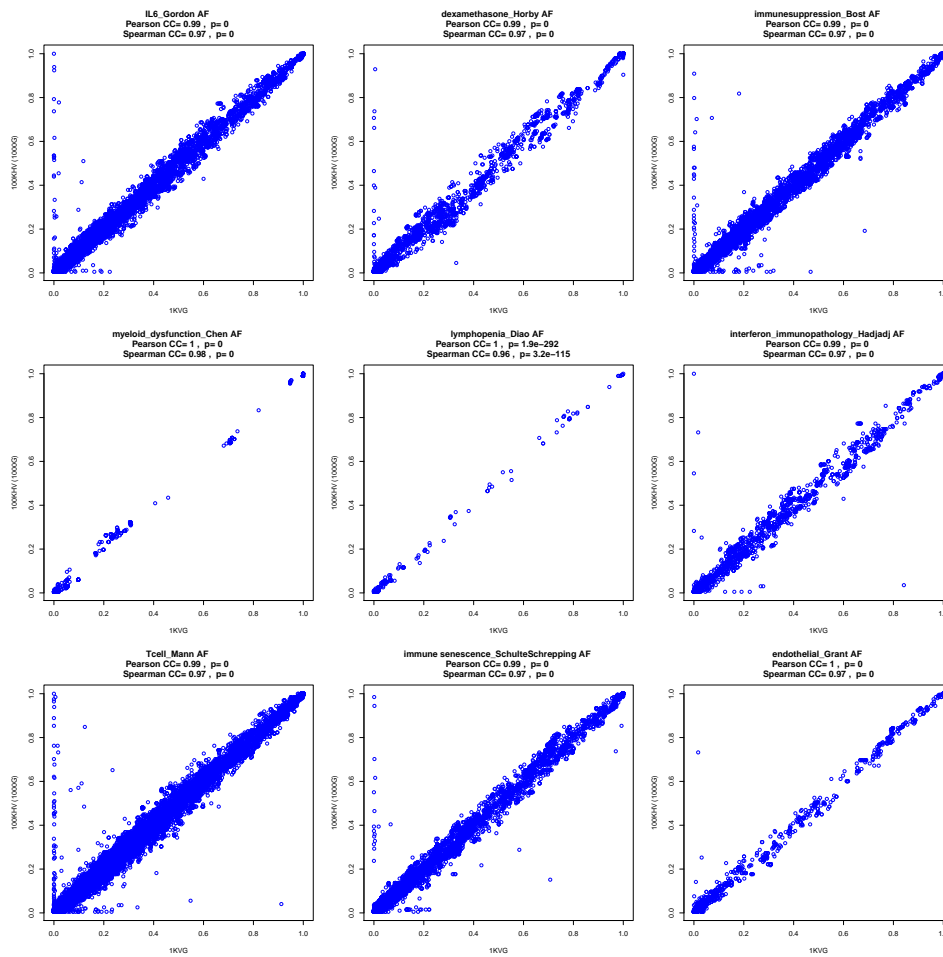

Supplementary Figure 3: Scatter plots of allele frequency from datasets: one from WGS of Vietnamese people in the 1000 Genomes Project with high coverage, and the other from WGS of 1000 Vietnamese people [1] with nine immune gene sets associated with severity of COVID-19 in Vietnam.

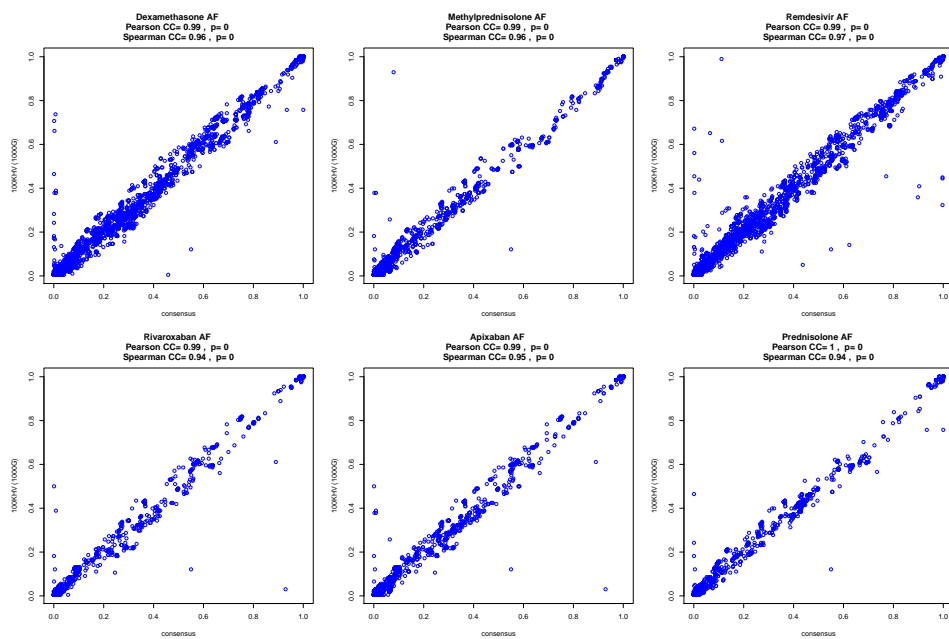

Supplementary Figure 4: Scatter plots of allele frequency from datasets: one from WGS of Vietnamese people in the 1000 Genomes Project with high coverage, and the other from WGS of 1000 Vietnamese people [1] with 6 target gene sets of COVID-19 drugs used in Vietnam.

## References

- [1] 1kvg data portal. <https://genome.vinbigdata.org/>.
